# Supplementary material
Source: PubMed Central journal article supplement (PMC3294662)
Supplement: supp_80.3.1181_IAI-IAI05711-11-s01.pdf [file supp_80.3.1181_IAI-IAI05711-11-s01.pdf]

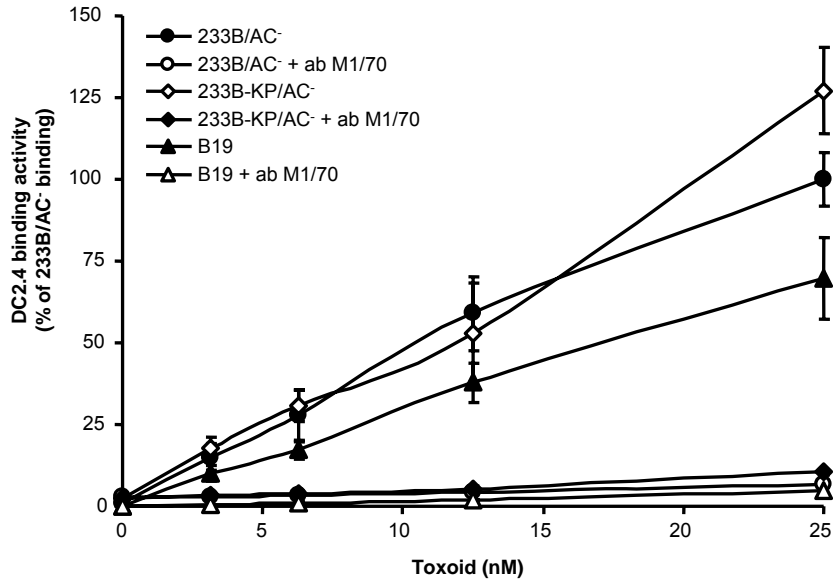

**Fig. S1. Binding activities of 233B-KP/AC<sup>-</sup> and B19 constructs.** DC2.4 cells were incubated with the indicated concentrations of biotinylated B/AC<sup>-</sup> toxoids in DMEM with 1% FCS for 30 min on ice. Upon cell staining with streptavidin-PE conjugate, toxoid binding was determined by flow cytometry. Cell preincubation for 30 min on ice with 10 µg/ml of the CD11b-specific antibody M1/70 prior to addition of toxoids was used to block the CD11b/CD18 receptor. The DC2.4 cell binding activities are expressed as percentages of 233B/AC<sup>-</sup> toxoid binding at 25 nM concentration and represent the means ± SD of two independent determinations performed in duplicate ( $n = 4$ ).

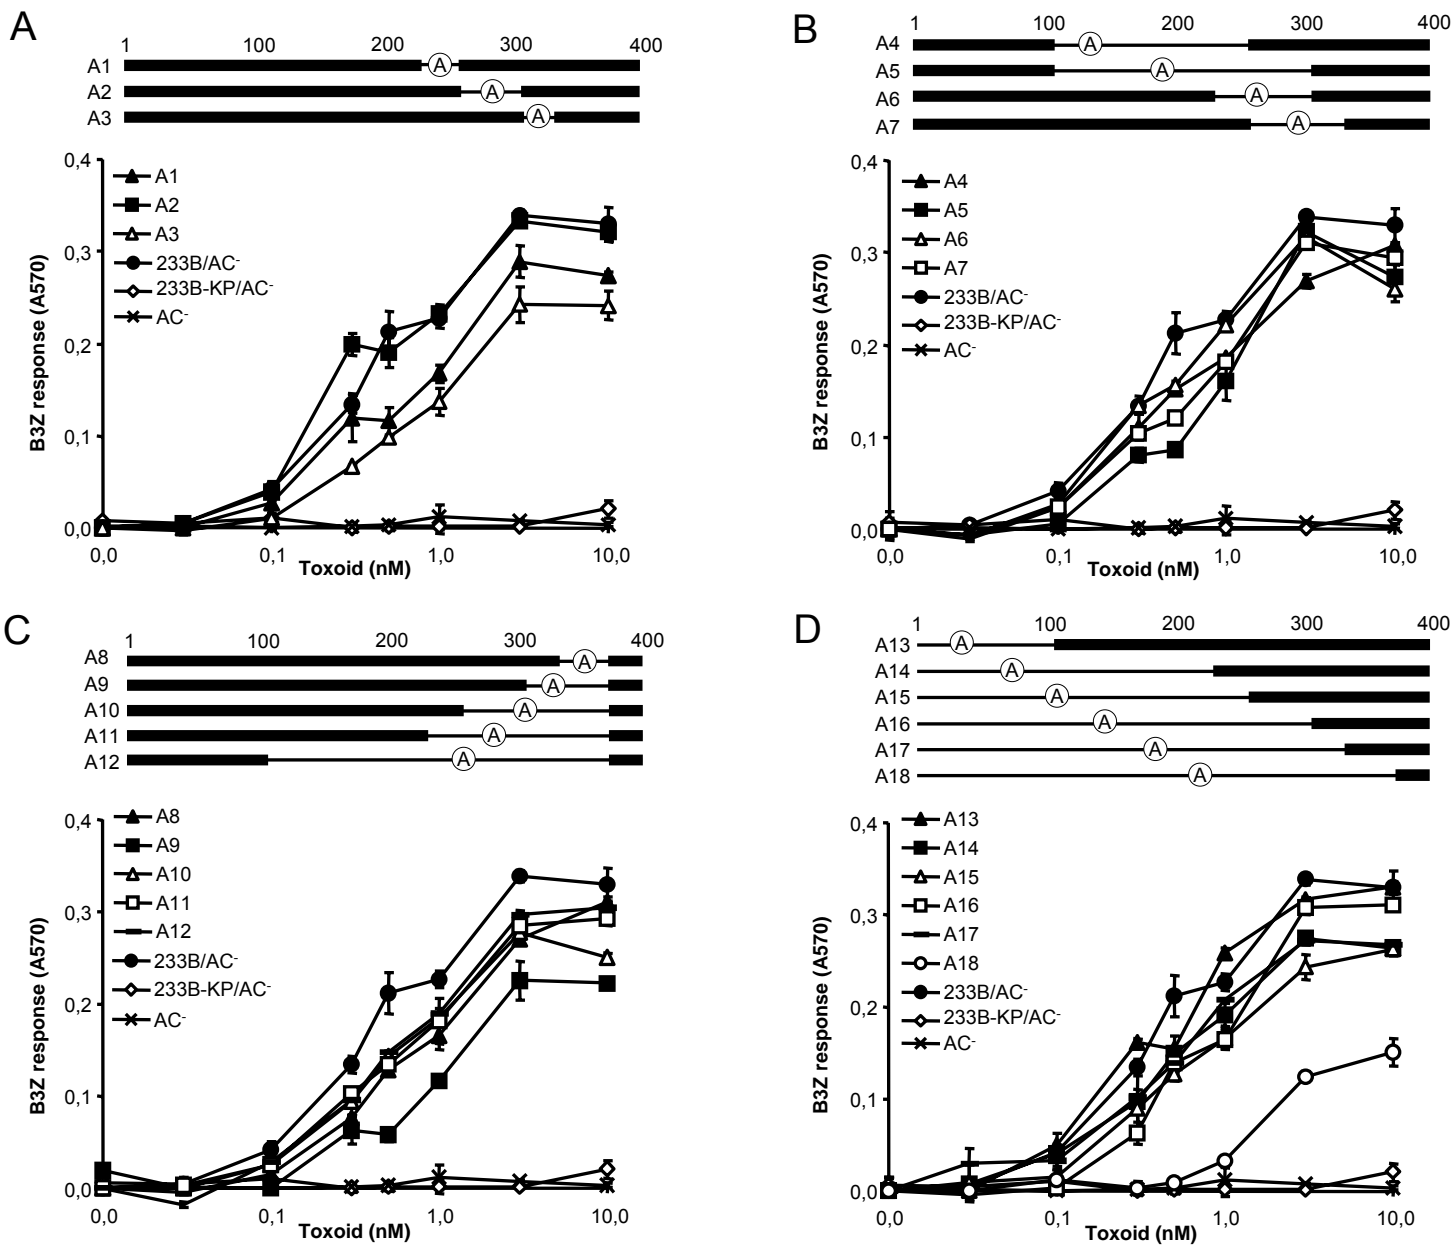

**Fig. S2.** The entire AC domain polypeptide sequence is dispensable for CyaA-mediated delivery of the OVA<sub>257-264</sub> epitope for MHC class I-restricted antigenic presentation. DC2.4 cells were incubated with the indicated concentrations of the toxoids for 4 hours. After washing with PBS, the DC2.4 cells were further cultured for 18 h with the B3Z CD8<sup>+</sup> T-hybridoma cells selectively recognizing cell-surface-presented complexes of the H-2K<sup>b</sup> MHC class I molecules with bound OVA<sub>257-264</sub> peptide. Stimulation of B3Z cells was assayed as the amount of accumulated  $\beta$ -galactosidase. The means  $\pm$  SE of duplicate samples, representative of three independent determinations, are shown.
